# Supplementary material
Source: PubMed Central journal article supplement (PMC2732012)
Supplement: NIHMS70214-supplement-supp_fig.pdf [file NIHMS70214-supplement-supp_fig.pdf]

# Supplemental Figure

## HUMAN *FTO* GENE

(Chromosome 16q12.2)

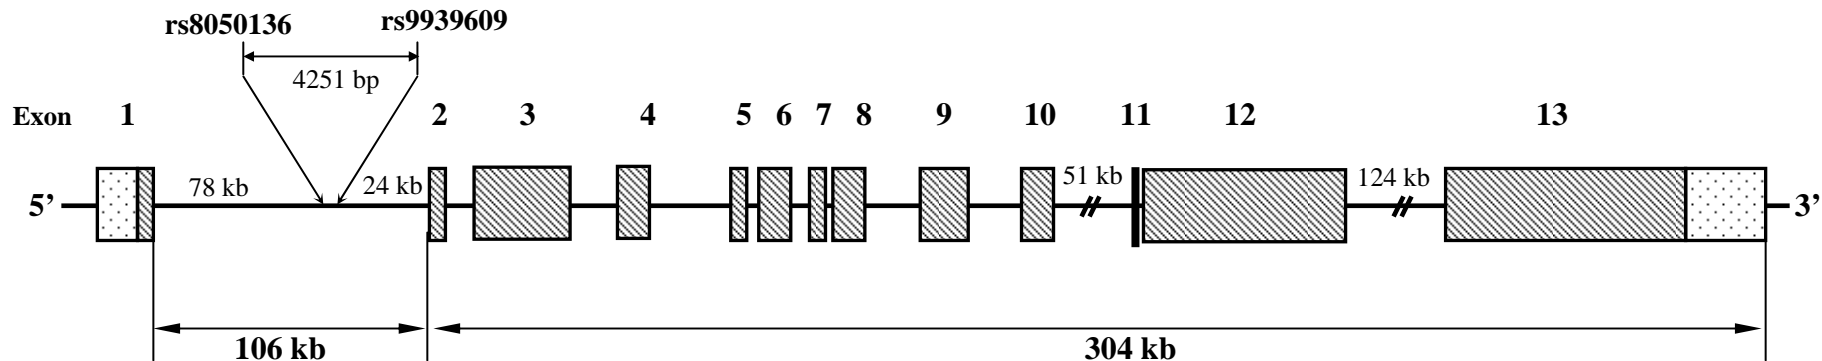

**Supplemental Figure.** Schematic presentation of the human *FTO* gene structure.

Two SNPs (rs9939609 and rs8050136) within the intron 1 had most strong associations with obesity and type 2 diabetes in European populations. These two loci are 4251 bp apart and in high LD ( $D' = 0.91-0.92$  and  $r^2 = 0.74-0.79$ ) in four ethnic groups of our U.S. population.
